# Supplementary material for: Characterizing a thermostable Cas9 for bacterial genome editing and silencing
Source: PubMed Central journal article supplement (PMC5698299; doi:10.1038/s41467-017-01591-4), 2017-11-21
Supplement: 41467_2017_1591_MOESM1_ESM.pdf [file 41467_2017_1591_MOESM1_ESM.pdf]

**Supplementary Table 1 | pBLAST results of Cas9 protein sequences from Figure 1B compared to ThermoCas9.**

| Species                                          | % identity <sup>a</sup> |
|--------------------------------------------------|-------------------------|
| <i>Geobacillus</i> 47C-IIb                       | 99                      |
| <i>Geobacillus</i> 46C-IIa                       | 89                      |
| <i>Geobacillus</i> LC300                         | 89                      |
| <i>Geobacillus jurassicus</i>                    | 89                      |
| <i>Geobacillus</i> MAS1                          | 88                      |
| <i>Geobacillus stearothermophilus</i>            | 88                      |
| <i>Geobacillus stearothermophilus</i> ATCC 12980 | 88                      |
| <i>Geobacillus</i> Sah69                         | 88                      |
| <i>Geobacillus stearothermophilus</i>            | 88                      |
| <i>Geobacillus kaustophilus</i>                  | 88                      |
| <i>Geobacillus stearothermophilus</i>            | 88                      |
| <i>Geobacillus</i> genomsp. 3                    | 87                      |
| <i>Geobacillus</i> genomsp. 3                    | 87                      |
| <i>Geobacillus subterraneus</i>                  | 87                      |
| <i>Effusibacillus pohliae</i>                    | 86                      |

<sup>a</sup> Query coverage was 100% in all cases.

Supplementary Table 2 | Oligonucleotides used in this study, related to Figures 1 to 4.

| Oligo  | Sequence                                                                                             | Description                                                                          |
|--------|------------------------------------------------------------------------------------------------------|--------------------------------------------------------------------------------------|
| BG6494 | TATGCC <b>TCATGAGATTATCAAAAAGGATCTTCACNNNNNNN</b> CTAGA<br>TCCTTTAAATTAATAAATGAAGTTTTAAATCAATC       | FW for construction of <i>in vitro</i> target DNA with 7-nt long random PAM sequence |
| BG6495 | TATGCC <b>GGATCCTCAGACCAAGTTTACTCATATATACTTTAGATTGAT</b><br>TTAAAAC <b>TCATTTTAAATTTAAAAGGATCTAG</b> | RV for construction of <i>in vitro</i> target DNA sequences                          |
| BG7356 | TCGTCGGCAGCGTCAGATGTGTATAAGAGACAG-T-                                                                 | Adaptor when annealed with BG7357, ligates to A-tailed ThermoCas9 cleaved fragments  |
| BG7357 | CTGTCTTTATACACATCTGACGCTGCCGACGA                                                                     | Adaptor when annealed with BG7356, ligates to A-tailed ThermoCas9 cleaved fragments  |
| BG7358 | TCGTCGGCAGCGTCAG                                                                                     | FW sequencing adaptor for PCR amplification of the ThermoCas9 cleaved fragments      |
| BG7359 | GTCTCGTGGGCTCGGAGATGTGTATAAGAGACAGGACCATGATTACG<br>CCAAGC                                            | RV sequencing adapter for PCR amplification of the ThermoCas9 cleaved fragments      |
| BG7616 | TCGTCGGCAGCGTCAGATGTGTATAAGAGACAGGGTCATGAGATTAT<br>CAAAAAGGATCTC                                     | RV sequencing adaptor for PCR amplification of the control fragments                 |
| BG8157 | TATGCC <b>TCATGAGATTATCAAAAAGGATCTTCACCCCCAG</b> CTAG<br>ATCCTTTAAATTAATAAATGAAGTTTTAAATCAATC        | FW for construction of <i>in vitro</i> target DNA with PAM "CCCCCAG"                 |
| BG8158 | TATGCC <b>TCATGAGATTATCAAAAAGGATCTTCACCCCCAA</b> CTA<br>GATCCTTTAAATTAATAAATGAAGTTTTAAATCAATC        | FW for construction of <i>in vitro</i> target DNA with PAM "CCCCCAA"                 |
| BG8159 | <b>TATGCCTCATGAGATTATCAAAAAGGATCTTCACCCCCAT</b> CTA<br>GATCCTTTAAATTAATAAATGAAGTTTTAAATCAATC         | FW for construction of <i>in vitro</i> target DNA with PAM "CCCCCAT"                 |
| BG8160 | TATGCC <b>TCATGAGATTATCAAAAAGGATCTTCACCCCCAC</b> CTAG<br>ATCCTTTAAATTAATAAATGAAGTTTTAAATCAATC        | FW for construction of <i>in vitro</i> target DNA with PAM "CCCCCAC"                 |
| BG8161 | TATGCC <b>TCATGAGATTATCAAAAAGGATCTTCACNNNTNN</b> CTAGA<br>TCCTTTAAATTAATAAATGAAGTTTTAAATCAATC        | FW for construction of <i>in vitro</i> target DNA with PAM "NNNTNN"                  |
| BG8363 | ACGGTTATCCACAGAATCAG                                                                                 | FW for PCR linearization of PAM identification libraries                             |
| BG8364 | CGGGATTGACTTTTAAAAAAGG                                                                               | RV for PCR linearization of PAM identification libraries                             |
| BG8763 | TATGCC <b>TCATGAGATTATCAAAAAGGATCTTCACCCCCAA</b> CTAG<br>ATCCTTTAAATTAATAAATGAAGTTTTAAATCAATC        | FW for construction of <i>in vitro</i> target DNA with PAM position 6&7 "AA"         |
| BG8764 | <b>TATGCCTCATGAGATTATCAAAAAGGATCTTCACCCCCA</b> CTA<br>GATCCTTTAAATTAATAAATGAAGTTTTAAATCAATC          | FW for construction of <i>in vitro</i> target DNA with PAM position 6&7 "AT"         |
| BG8765 | TATGCC <b>TCATGAGATTATCAAAAAGGATCTTCACCCCCA</b> CTAG<br>ATCCTTTAAATTAATAAATGAAGTTTTAAATCAATC         | FW for construction of <i>in vitro</i> target DNA with PAM position 6&7 "AG"         |
| BG8766 | TATGCC <b>TCATGAGATTATCAAAAAGGATCTTCACCCCCA</b> CTAG<br>ATCCTTTAAATTAATAAATGAAGTTTTAAATCAATC         | FW for construction of <i>in vitro</i> target DNA with PAM position 6&7 "AC"         |

PAM Library construction

|                                                | Oligo  | Sequence                                                                               | Description                                                                                                                     |
|------------------------------------------------|--------|----------------------------------------------------------------------------------------|---------------------------------------------------------------------------------------------------------------------------------|
| PAM Library construction                       | BG8767 | TATGCCTCATGAGATTATCAAAAAGGATCTTCACCCCCCTAACTAG<br>ATCCTTTAAATTAATAAATGAAGTTTTAAATCAATC | FW for construction of <i>in vitro</i> target DNA with PAM position 6&7 "TA"                                                    |
|                                                | BG8768 | TATGCCTCATGAGATTATCAAAAAGGATCTTCACCCCCCTTACTAG<br>ATCCTTTAAATTAATAAATGAAGTTTTAAATCAATC | FW for construction of <i>in vitro</i> target DNA with PAM position 6&7 "TT"                                                    |
|                                                | BG8769 | TATGCCTCATGAGATTATCAAAAAGGATCTTCACCCCCCTGACTAG<br>ATCCTTTAAATTAATAAATGAAGTTTTAAATCAATC | FW for construction of <i>in vitro</i> target DNA with PAM position 6&7 "TG"                                                    |
|                                                | BG8770 | TATGCCTCATGAGATTATCAAAAAGGATCTTCACCCCCCTCACTAG<br>ATCCTTTAAATTAATAAATGAAGTTTTAAATCAATC | FW for construction of <i>in vitro</i> target DNA with PAM position 6&7 "TC"                                                    |
|                                                | BG8771 | TATGCCTCATGAGATTATCAAAAAGGATCTTCACCCCCGAACTAG<br>ATCCTTTAAATTAATAAATGAAGTTTTAAATCAATC  | FW for construction of <i>in vitro</i> target DNA with PAM position 6&7 "GA"                                                    |
|                                                | BG8772 | TATGCCTCATGAGATTATCAAAAAGGATCTTCACCCCCGTACTAG<br>ATCCTTTAAATTAATAAATGAAGTTTTAAATCAATC  | FW for construction of <i>in vitro</i> target DNA with PAM position 6&7 "GT"                                                    |
|                                                | BG8773 | TATGCCTCATGAGATTATCAAAAAGGATCTTCACCCCCGGACTAG<br>ATCCTTTAAATTAATAAATGAAGTTTTAAATCAATC  | FW for construction of <i>in vitro</i> target DNA with PAM position 6&7 "GG"                                                    |
|                                                | BG8774 | TATGCCTCATGAGATTATCAAAAAGGATCTTCACCCCCGCACTAG<br>ATCCTTTAAATTAATAAATGAAGTTTTAAATCAATC  | FW for construction of <i>in vitro</i> target DNA with PAM position 6&7 "GC"                                                    |
|                                                | BG8775 | TATGCCTCATGAGATTATCAAAAAGGATCTTCACCCCCCAACTAG<br>ATCCTTTAAATTAATAAATGAAGTTTTAAATCAATC  | FW for construction of <i>in vitro</i> target DNA with PAM position 6&7 "CA"                                                    |
|                                                | BG8776 | TATGCCTCATGAGATTATCAAAAAGGATCTTCACCCCCCTACTAG<br>ATCCTTTAAATTAATAAATGAAGTTTTAAATCAATC  | FW for construction of <i>in vitro</i> target DNA with PAM position 6&7 "CT"                                                    |
|                                                | BG8777 | TATGCCTCATGAGATTATCAAAAAGGATCTTCACCCCCCGACTAG<br>ATCCTTTAAATTAATAAATGAAGTTTTAAATCAATC  | FW for construction of <i>in vitro</i> target DNA with PAM position 6&7 "CG"                                                    |
|                                                | BG8778 | TATGCCTCATGAGATTATCAAAAAGGATCTTCACCCCCCCACTAG<br>ATCCTTTAAATTAATAAATGAAGTTTTAAATCAATC  | FW for construction of <i>in vitro</i> target DNA with PAM position 6&7 "CC"                                                    |
| sgRNA module for <i>in vitro</i> transcription | BG6574 | AAGCTTGAAATAATACGACTCACTATAGG                                                          | FW for PCR amplification of the sgRNA template for the first PAM identification process (30nt long spacer)                      |
|                                                | BG6576 | AAAAAAGACCTTGACGTTTTCC                                                                 | FW for PCR amplification of the sgRNA template for the first PAM identification process                                         |
|                                                | BG9307 | AAGCTTGAAATAATACGACTCACTATAGGTGAGATTATCAAAAAGG<br>ATCTTCACGTC                          | RV for PCR amplification of the sgRNA template for all the PAM identification processes except the first one (25nt long spacer) |
|                                                | BG9309 | AAAACGCCTAAGAGTGGGGAATG                                                                | RV for PCR amplification of the 3-hairpins long sgRNA template for all the PAM identification processes except the first one    |
|                                                | BG9310 | AAAAGGCGATAGGCGATCC                                                                    | RV for PCR amplification of the 2-hairpins long sgRNA template for all the PAM identification processes except the first one    |
|                                                | BG9311 | AAAACGGGTCAGTCTGCCTATAG                                                                | RV for PCR amplification of the 1-hairpin long sgRNA template for all the PAM identification processes except the first one     |
|                                                | BG9308 | AAGCTTGAAATAATACGACTCACTATAGGTGAGATTATCAAAAAGG<br>ATCTTCACGTC                          | pT7 and 25nt spacer sgRNA Fw                                                                                                    |

|                                                       | <b>Oligo</b> | <b>Sequence</b>                                                  | <b>Description</b>                                                            |
|-------------------------------------------------------|--------------|------------------------------------------------------------------|-------------------------------------------------------------------------------|
| <b>sgRNA module for <i>in vitro</i> transcription</b> | BG10118      | AAGCTTGAAATAATACGACTCACTATAGGAGATTATCAAAAAGGAT<br>CTTCACGTCA     | pT7 and 24nt spacer sgRNA Fw                                                  |
|                                                       | BG10119      | AAGCTTGAAATAATACGACTCACTATAGGAAGATTATCAAAAAGGA<br>TCTTCACGTCATAG | pT7 and 23nt spacer sgRNA Fw                                                  |
|                                                       | BG10120      | AAGCTTGAAATAATACGACTCACTATAGGATTATCAAAAAGGATCTT<br>CACGTCATAGT   | pT7 and 22nt spacer sgRNA Fw                                                  |
|                                                       | BG10121      | AAGCTTGAAATAATACGACTCACTATAGGAATTATCAAAAAGGATCT<br>TCACGTCATAGTT | pT7 and 21nt spacer sgRNA Fw                                                  |
|                                                       | BG10122      | AAGCTTGAAATAATACGACTCACTATAGGTTATCAAAAAGGATCTTC<br>ACGTCATAGTT   | pT7 and 20nt spacer sgRNA Fw                                                  |
|                                                       | BG10123      | AAGCTTGAAATAATACGACTCACTATAGGTATCAAAAAGGATCTTCA<br>CGTCATAGTTC   | pT7 and 19nt spacer sgRNA Fw                                                  |
|                                                       | BG10124      | AAGCTTGAAATAATACGACTCACTATAGGATCAAAAAGGATCTTCAC<br>GTCATAGTTC    | pT7 and 18nt spacer sgRNA Fw                                                  |
| <b>Editing and silencing constructs</b>               | BG9312       | AAAACGCCTAAGAGTGGGGAATGCCCGAAGAAAGCGGGCGATAGGC<br>GATCC          | 3 loops sgRNA OH Rv                                                           |
|                                                       | BG8191       | AAGCTTGGCGTAATCATGGTC                                            | For the construction of the pThermoCas9_ctrl plasmid & pThermoCas9_bsΔpyrF1/2 |
|                                                       | BG8192       | TCATGAGTCCCATGTTGTG                                              | For the construction of the pThermoCas9_ctrl plasmid & pThermoCas9_bsΔpyrF1/2 |
|                                                       | BG8194       | tatggcgaatcacaacatgggaactcatgaAACATCCTCTTTCTTAG                  | For the construction of the pThermoCas9_ctrl plasmid & pThermoCas9_bsΔpyrF1/2 |
|                                                       | BG8195       | gccgatatcaagaccgattttatactcatTTAAGTTACCTCCTCGATTG                | For the construction of the pThermoCas9_ctrl plasmid & pThermoCas9_bsΔpyrF1/2 |
|                                                       | BG8196       | ATGAAGTATAAAATCGGTCTTG                                           | For the construction of the pThermoCas9_ctrl plasmid & pThermoCas9_bsΔpyrF1/2 |
|                                                       | BG8197       | TAACGGACGGATAGTTTC                                               | For the construction of the pThermoCas9_ctrl plasmid & pThermoCas9_bsΔpyrF1/2 |
|                                                       | BG8198       | gaaagccgggaaactatccgtccgtataAATCAGACAAAATGGCCTGCTTATG            | For the construction of the pThermoCas9_ctrl plasmid & pThermoCas9_bsΔpyrF1/2 |
|                                                       | BG8263       | gaactatgacactttatttcagaatggacGTATAACGGTATCCATTTAAGAATAATCC       | For the construction of the pThermoCas9_ctrl plasmid                          |
|                                                       | BG8268       | accgttatacgtccattctgaaaataaagtGTCATAGTTCCTGAGAT                  | For the construction of the pThermoCas9_ctrl plasmid                          |
|                                                       | BG8210       | aacagctatgaccatgattacgccaagcttCCCTCCCATGCACAATAG                 | For the construction of the pThermoCas9_ctrl plasmid & pThermoCas9_bsΔpyrF1/2 |
|                                                       | BG8261       | gaactatgacatcatggagtttaaatccaGTATAACGGTATCCATTTAAGAATAATC<br>C   | For the construction of the pThermoCas9_bsΔpyrF1                              |
|                                                       | BG8266       | accgttatacgtgatttaaaactccatgatGTCATAGTTCCTGAGAT                  | For the construction of the pThermoCas9_bsΔpyrF2                              |
|                                                       | BG8317       | gaactatgaccaccagcttacatcaacaaGTATAACGGTATCCATTTAAGAATAATC<br>C   | For the construction of the pThermoCas9_ΔbspyrF2                              |
|                                                       | BG8320       | accgttatacgttggatgtaagctgggtgGTCATAGTTCCTGAGAT                   | For the construction of the pThermoCas9_bsΔpyrF2                              |



Editing and silencing constructs

| Oligo  | Sequence                                                          | Description                                       |
|--------|-------------------------------------------------------------------|---------------------------------------------------|
| BG9075 | CTATCGGCATTACGTCTATC                                              | For the construction of the pThermoCas9i_ctrl     |
| BG9076 | GCGTCGACTTCTGTATAGC                                               | For the construction of the pThermoCas9i_ctrl     |
| BG9091 | TGAAGTATAAAATCGGTCTTGTCTATCGGCATTACGTCTATC                        | For the construction of the pThermoCas9i_ctrl     |
| BG9092 | CAAGCTTCGGCTGTATGGAATCACAGCGTCGACTTCTGTATAGC                      | For the construction of the pThermoCas9i_ctrl     |
| BG9077 | GCTGTGATTCCATACAG                                                 | For the construction of the pThermoCas9i_ctrl     |
| BG9267 | GGTGCAGTAGGTTGCAGCTATGCTTGTATAACGGTATCCAT                         | For the construction of the pThermoCas9i_ctrl     |
| BG9263 | AAGCATAGCTGCAACCTACTGCACCGTCATAGTTCCCCTGAGATTATCG                 | For the construction of the pThermoCas9i_ctrl     |
| BG9088 | TCATGACCAAATCCCTTAACG                                             | For the construction of the pThermoCas9i_ctrl     |
| BG9089 | TTAAGGGATTTTGGTCATGAGAATCCTCTTTCTTAG                              | For the construction of the pThermoCas9i_ctrl     |
| BG9090 | GCAAGACCGATTTTATACTTCATTTAAG                                      | For the construction of the pThermoCas9i_ctrl     |
| BG9548 | GGATCCCATGACGCTAGTATCCAGCTGGGTCATAGTCCCCTGAGATTATCG               | For the construction of the pThermoCas9i_ldhL     |
| BG9601 | TTCAATATTTTTTTGAATAAAAAAATACGATACAATAAAAAATGTCTAGAAAAAGATAAAAAATG | For the construction of the pThermoCas9i_ldhL     |
| BG9600 | TTTTTATTCAAAAAAATATTGAATTTTAAAAATGATGGTGCTAGTATGAAG               | For the construction of the pThermoCas9i_ldhL     |
| BG9549 | CCAGCTGGATACTAGCGTCATGGGATCCGTATAACGGTATCCATTTAAGAATAATCC         | For the construction of the pThermoCas9i_ldhL     |
| BG8552 | TCGGGGGTTTCGTTCCCTTG                                              | FW to check genomic <i>pyrF</i> deletion KO check |
| BG8553 | CTTACACAGCCAGTGACGGAAC                                            | RV to check genomic <i>pyrF</i> deletion KO check |
| BG2365 | GCCGGCGTCCCGAAAAACGA                                              | For the construction of the pThermoCas9_ppΔpyrF   |
| BG2366 | GCAGGTCGGGTTCCCTCGCATCCATGCCCCGAACT                               | For the construction of the pThermoCas9_ppΔpyrF   |
| BG2367 | ggcttcggaatcgtttccgggacgccgcACGGCATTGGCAAGGCCAAG                  | For the construction of the pThermoCas9_ppΔpyrF   |
| BG2368 | gacacagcatcggtGCAGGGTCTCTTGGCAAGTC                                | For the construction of the pThermoCas9_ppΔpyrF   |
| BG2369 | gccaagagaccctgCACCGATGCCTGTGTCGAACC                               | For the construction of the pThermoCas9_ppΔpyrF   |
| BG2370 | cttggcgaaaacgtcaaggctctttttacACGCGCATCAACTTCAAGGC                 | For the construction of the pThermoCas9_ppΔpyrF   |
| BG2371 | atgacgagctgttcaccagcagcgcTATTATTGAAGCATTATCAGGG                   | For the construction of the pThermoCas9_ppΔpyrF   |
| BG2372 | GTA AAAAAGACCTTGACGTTTTTC                                         | For the construction of the pThermoCas9_ppΔpyrF   |

|                                  | Oligo            | Sequence                                                                                                                          | Description                                                                             |
|----------------------------------|------------------|-----------------------------------------------------------------------------------------------------------------------------------|-----------------------------------------------------------------------------------------|
| Editing and silencing constructs | BG2373           | tatgaagcgggcatTTGAAGACGAAAGGGCCTC                                                                                                 | For the construction of the pThermoCas9_ppΔpyrF                                         |
|                                  | BG2374           | taatagcgcctgctgggtaacagctcGTCATAGTTCCCTGAGATTATCG                                                                                 | For the construction of the pThermoCas9_ppΔpyrF                                         |
|                                  | BG2375           | tggagtcatgaacatATGAAGTATAAAAATCGGTCTTG                                                                                            | For the construction of the pThermoCas9_ppΔpyrF                                         |
|                                  | BG2376           | cccttctgtctcAAATGGCCCGCTTCATAAGCAG                                                                                                | For the construction of the pThermoCas9_ppΔpyrF                                         |
|                                  | BG2377           | gattttatacTTCATATGTTTCATGACTCCATTATTATTG                                                                                          | For the construction of the pThermoCas9_ppΔpyrF                                         |
|                                  | BG2378           | ggggcatggatgCGAGGAACCCGACCTGCATTGG                                                                                                | For the construction of the pThermoCas9_ppΔpyrF                                         |
|                                  | BG2381           | ACACGGCGGATGCACTTACC                                                                                                              | FW for confirmation of plasmid integration and <i>pyrF</i> deletion in <i>P. putida</i> |
|                                  | BG2382           | TGGACGTGTACTTCGACAAC                                                                                                              | RV for confirmation of <i>pyrF</i> deletion in <i>P. putida</i>                         |
|                                  | BG2135           | ACACGGCGGATGCACTTACC                                                                                                              | RV for confirmation of plasmid integration in <i>P. putida</i>                          |
| Sequencing primers               | BG8196           | TGGACGTGTACTTCGACAAC                                                                                                              | <i>thermocas9</i> seq. 1                                                                |
|                                  | BG8197           | TAACGGACGGATAGTTTC                                                                                                                | <i>thermocas9</i> seq. 2                                                                |
|                                  | BG6850           | GCCTCATGAATGCAGCGATGGTCCGGTGTTTC                                                                                                  | <i>pyrF</i> US                                                                          |
|                                  | BG6849           | GCCTCATGAGTTCCCATGTTGTGATTC                                                                                                       | <i>pyrF</i> DS                                                                          |
|                                  | BG6769           | CAATCCAACCTGGGCTTGAC                                                                                                              | <i>thermocas9</i> seq. 3                                                                |
|                                  | BG6841           | CAAGAACTTTATTGGTATAG                                                                                                              | <i>thermocas9</i> seq. 4                                                                |
|                                  | BG6840           | TTGCAGAAATGGTTGTCAAG                                                                                                              | <i>thermocas9</i> seq. 5                                                                |
|                                  | BG9215           | GAGATAATGCCGACTGTAC                                                                                                               | pNW33n backbone seq. 1                                                                  |
|                                  | BG9216           | AGGGCTCGCCTTTGGGAAG                                                                                                               | pNW33n backbone seq. 2                                                                  |
|                                  | BG9505           | GTTGCCAACGTTCTGAG                                                                                                                 | <i>thermocas9</i> seq. 6                                                                |
| BG9506                           | AATCCACGCCGTTTAG | <i>thermocas9</i> seq. 7                                                                                                          |                                                                                         |
| Cleavage assays                  | BG8363           | ACGGTTATCCACAGAATCAG                                                                                                              | FW for PCR linearization of DNA target                                                  |
|                                  | BG8364           | CGGGATTGACTTTTAAAAAAGG                                                                                                            | RV for PCR linearization of DNA target                                                  |
|                                  | BG9302           | AAACTTCATTTTAAATTTAAAAGGATCTAGAACCCCGTGAAGATC<br>CTTTTGGATAATCTCATGACCAAAATCCCTTAACGTGAGTTTTTCGTTT<br>CACTGAGCGTCAGACCCCGTAGAAA   | Non-template strand oligonucleotide for ssDNA cleavage assays                           |
|                                  | BG9303           | TTTCTACGGGGTCTGACGCTCAGTGGAACGAAAACCTCACGTTAAGGG<br>ATTTTGGTCATGAGATTATCAAAAAGGATCTTCACCCCCCAACTAG<br>ATCCTTTTAAATTTAAAAATGAAGTTT | Template strand oligonucleotide for ssDNA cleavage assays                               |

|                                           | Oligo                                   | Sequence                                                                                                                           | Description                                                                                |
|-------------------------------------------|-----------------------------------------|------------------------------------------------------------------------------------------------------------------------------------|--------------------------------------------------------------------------------------------|
|                                           | BG9304                                  | TTTCTACGGGGTCTGACGCTCAGTGGAAACGAAAACCTCACGTTAAGGG<br>ATTTTGGTCATGAGATTATCAAAAAGGATCTTCACGGGGGGTCTAG<br>ATCCTTTTAAATTAATAAATGAAGTTT | Template strand oligonucleotide for ssDNA cleavage assays                                  |
| ThermoCas9<br>expression                  | BG7886                                  | TACTTCCAATCCAATGCAAAGTATAAAAATCGGTCTTGATATCG                                                                                       | FW LIC_thermocas9                                                                          |
|                                           | BG7887                                  | TTATCCACTTCCAATGTTATTATAACGGACGGATAGTTCCCCGGCTT<br>TC                                                                              | RV LIC_thermocas9                                                                          |
| RT-qPCR                                   | BG9665                                  | ATGACGAAAGGAGTTTCTTATTATG                                                                                                          | RV qPCR check <i>ldhl</i>                                                                  |
|                                           | BG9666                                  | AACGGTATCCGTGATTAAG                                                                                                                | FW qPCR check <i>ldhl</i>                                                                  |
| <i>In vitro</i> ThermoCas9 Mismatch assay | BG10561                                 | CATGAGATTATCAAAAAGGATCTTCAACCCCCCAACTAGG                                                                                           | FW for construction of <i>in vitro</i> target DNA with mismatch at PAM proximal position 1 |
|                                           | BG10562                                 | GATCCCTAGTTGGGGGGTTGAAGATCCTTTTTGATAATCT                                                                                           | RV for construction of <i>in vitro</i> target DNA with mismatch at PAM proximal position 1 |
|                                           | BG10563                                 | CATGAGATTATCAAAAAGGATCTTCCCCCCCCAACTAGG                                                                                            | FW for construction of <i>in vitro</i> target DNA with mismatch at PAM proximal position 2 |
|                                           | BG10564                                 | GATCCCTAGTTGGGGGGGGGAAGATCCTTTTTGATAATCT                                                                                           | RV for construction of <i>in vitro</i> target DNA with mismatch at PAM proximal position 2 |
|                                           | BG10565                                 | CATGAGATTATCAAAAAGGATCTTAACCCCCCAACTAGG                                                                                            | FW for construction of <i>in vitro</i> target DNA with mismatch at PAM proximal position 3 |
|                                           | BG10566                                 | GATCCCTAGTTGGGGGGGTTAAGATCCTTTTTGATAATCT                                                                                           | RV for construction of <i>in vitro</i> target DNA with mismatch at PAM proximal position 3 |
|                                           | BG10567                                 | CATGAGATTATCAAAAAGGATCTGCACCCCCCAACTAGG                                                                                            | FW for construction of <i>in vitro</i> target DNA with mismatch at PAM proximal position 4 |
|                                           | BG10568                                 | GATCCCTAGTTGGGGGGGTGCAGATCCTTTTTGATAATCT                                                                                           | RV for construction of <i>in vitro</i> target DNA with mismatch at PAM proximal position 4 |
|                                           | BG10569                                 | CATGAGATTATCAAAAAGGATCGTCACCCCCCAACTAGG                                                                                            | FW for construction of <i>in vitro</i> target DNA with mismatch at PAM proximal position 5 |
|                                           | BG10570                                 | GATCCCTAGTTGGGGGGGTGACGATCCTTTTTGATAATCT                                                                                           | RV for construction of <i>in vitro</i> target DNA with mismatch at PAM proximal position 5 |
| BG10571                                   | CATGAGATTATCAAAAAGGATATTCACCCCCCAACTAGG | FW for construction of <i>in vitro</i> target DNA with mismatch at PAM proximal position 6                                         |                                                                                            |

In vitro ThermoCas9 Mismatch assay

| Oligo   | Sequence                                  | Description                                                                                   |
|---------|-------------------------------------------|-----------------------------------------------------------------------------------------------|
| BG10572 | GATCCCTAGTTGGGGGGGTGAATATCCTTTTGGATAATCT  | RV for construction of <i>in vitro</i> target DNA with mismatch at PAM proximal position 6    |
| BG10573 | CATGAGATTATCAAAAAGGAGCTTCACCCCCCACTAGG    | FW for construction of <i>in vitro</i> target DNA with mismatch at PAM proximal position 7    |
| BG10574 | GATCCCTAGTTGGGGGGGTGAAGCTCCTTTTGGATAATCT  | RV for construction of <i>in vitro</i> target DNA with mismatch at PAM proximal position 7    |
| BG10575 | CATGAGATTATCAAAAAGGCTTTCACCCCCCACTAGG     | FW for construction of <i>in vitro</i> target DNA with mismatch at PAM proximal position 8    |
| BG10576 | GATCCCTAGTTGGGGGGGTGAAGAGCCTTTTGGATAATCT  | RV for construction of <i>in vitro</i> target DNA with mismatch at PAM proximal position 8    |
| BG10577 | CATGAGATTATCAAAAAGTATCTTCACCCCCCACTAGG    | FW for construction of <i>in vitro</i> target DNA with mismatch at PAM proximal position 9    |
| BG10578 | GATCCCTAGTTGGGGGGGTGAAGATACTTTTGGATAATCT  | RV for construction of <i>in vitro</i> target DNA with mismatch at PAM proximal position 9    |
| BG10579 | CATGAGATTATCAAAAATGATCTTCACCCCCCACTAGG    | FW for construction of <i>in vitro</i> target DNA with mismatch at PAM proximal position 10   |
| BG10580 | GATCCCTAGTTGGGGGGGTGAAGATCATTTTTGGATAATCT | RV for construction of <i>in vitro</i> target DNA with mismatch at PAM proximal position 10   |
| BG10581 | CATGAGATTATCCAAAAGGATCTTCACCCCCCACTAGG    | FW for construction of <i>in vitro</i> target DNA with mismatch at PAM proximal position 15   |
| BG10582 | GATCCCTAGTTGGGGGGGTGAAGATCCTTTTGGATAATCT  | RV for construction of <i>in vitro</i> target DNA with mismatch at PAM proximal position 15   |
| BG10583 | CATGAGAGTATCAAAAAGGATCTTCACCCCCCACTAGG    | FW for construction of <i>in vitro</i> target DNA with mismatch at PAM proximal position 20   |
| BG10584 | GATCCCTAGTTGGGGGGGTGAAGATCCTTTTGGATACTCT  | RV for construction of <i>in vitro</i> target DNA with mismatch at PAM proximal position 20   |
| BG10585 | CATGAGAGGATCAAAAAGGATCTTCACCCCCCACTAGG    | FW for construction of <i>in vitro</i> target DNA with mismatch at PAM distal positions 19-20 |
| BG10586 | GATCCCTAGTTGGGGGGGTGAAGATCCTTTTGGATCCTCT  | RV for construction of <i>in vitro</i> target DNA with mismatch at PAM distal position 19-20  |
| BG10587 | CATGAGAGGCGCAAAAAGGATCTTCACCCCCCACTAGG    | FW for construction of <i>in vitro</i> target DNA with mismatch at PAM distal positions 17-20 |
| BG10588 | GATCCCTAGTTGGGGGGGTGAAGATCCTTTTGGCGCTCT   | RV for construction of <i>in vitro</i> target DNA with mismatch at PAM distal position 17-20  |
| BG10589 | CATGAGAGGCGACAAAAGGATCTTCACCCCCCACTAGG    | FW for construction of <i>in vitro</i> target DNA with mismatch at PAM distal positions 15-20 |

|                                           | <b>Oligo</b>                           | <b>Sequence</b>                                                                             | <b>Description</b>                                                                            |
|-------------------------------------------|----------------------------------------|---------------------------------------------------------------------------------------------|-----------------------------------------------------------------------------------------------|
| <i>In vitro</i> ThermoCas9 Mismatch assay | BG10590                                | GATCCCTAGTTGGGGGGTGAAGATCCTTTTGTGCGCCTCT                                                    | RV for construction of <i>in vitro</i> target DNA with mismatch at PAM distal position 15-20  |
|                                           | BG10591                                | CATGAGAGGCGACCCAAGGATCTTAC <b>CCCCCA</b> ACTAGG                                             | FW for construction of <i>in vitro</i> target DNA with mismatch at PAM distal positions 13-20 |
|                                           | BG10592                                | GATCCCTAGTTGGGGGGTGAAGATCCTTGGGTCGCCTCT                                                     | RV for construction of <i>in vitro</i> target DNA with mismatch at PAM distal position 13-20  |
|                                           | BG10593                                | CATGAGAGGCGACCCCGGATCTTAC <b>CCCCCA</b> ACTAGG                                              | FW for construction of <i>in vitro</i> target DNA with mismatch at PAM distal positions 11-20 |
|                                           | BG10594                                | GATCCCTAGTTGGGGGGTGAAGATCCGGGGTGCCTCT                                                       | RV for construction of <i>in vitro</i> target DNA with mismatch at PAM distal position 11-20  |
|                                           | BG10595                                | CATGAGAGGCGACCCCTTATCTTAC <b>CCCCCA</b> ACTAGG                                              | FW for construction of <i>in vitro</i> target DNA with mismatch at PAM distal position 9-20   |
|                                           | BG10596                                | GATCCCTAGTTGGGGGGTGAAGATAAGGGGTCGCCTCT                                                      | RV for construction of <i>in vitro</i> target DNA with mismatch at PAM distal position 9-20   |
|                                           | BG10597                                | CATGAGAGGCGACCCCTTCGAGTCAC <b>CCCCCA</b> ACTAGG                                             | FW for construction of <i>in vitro</i> target DNA with mismatch at PAM distal position 5-20   |
|                                           | BG10598                                | GATCCCTAGTTGGGGGGTGAAGATCGAAGGGGTCGCCTCT                                                    | RV for construction of <i>in vitro</i> target DNA with mismatch at PAM distal position 5-20   |
|                                           | BG10599                                | CATGAGAGGCGACCCCTTCGAGGACA <b>CCCCCA</b> ACTAGG                                             | FW for construction of <i>in vitro</i> target DNA with mismatch at PAM distal position 0-20   |
| BG10600                                   | GATCCCTAGTTGGGGGGTGCCTCGAAGGGGTCGCCTCT | FW for construction of <i>in vitro</i> target DNA with mismatch at PAM distal position 0-20 |                                                                                               |

Restriction sites are shown in italics. The PAMs are colored red. Spacer regions are shown in bold. Nucleotides in lowercase letters correspond to primer overhangs for HiFi DNA Assembly. LIC: Ligase Independent cloning; FW: Forward primer; RV: Reverse primer.

**Supplementary Table 3 | Plasmids used in this study, related to Figures 1 to 4.**

| Plasmid                    | Description                                                                                                                                                                                                     | Restriction sites used              | Primers           | Source            |
|----------------------------|-----------------------------------------------------------------------------------------------------------------------------------------------------------------------------------------------------------------|-------------------------------------|-------------------|-------------------|
| pNW33n                     | <i>E. coli-Bacillus</i> shuttle vector, cloning vector, Cam <sup>R</sup>                                                                                                                                        | -                                   | -                 | BGSC              |
| pUC57_T7sgRNAfull          | pUC57 vector containing DNA encoding the sgRNA under the control of T7 promoter; serves as a template for <i>in vitro</i> transcription of full length Repeat/Antirepeat sgRNAs                                 |                                     |                   | Baseclear         |
| pMA2_T7sgRNAtruncated R/AR | Vector containing DNA encoding the truncated Repeat/Antirepeat part of the sgRNA under the control of T7 promoter; serves as a template for <i>in vitro</i> transcription of truncated Repeat/Antirepeat sgRNAs | -                                   | -                 | Gen9              |
| pRARE                      | T7 RNA polymerase based expression vector, Kan <sup>R</sup>                                                                                                                                                     | -                                   | -                 | EMD Millipore     |
| pML-1B                     | <i>E. coli</i> Rosetta <sup>TM</sup> (DE3) plasmid, encodes rare tRNAs, Cam <sup>R</sup>                                                                                                                        | -                                   | -                 | Macrolab, Addgene |
| pEMG                       | <i>P. putida</i> suicide vector, used as template for replicon and Kan <sup>R</sup>                                                                                                                             |                                     | See table S1      | 1                 |
| pSW_I-SceI                 | <i>P. putida</i> vector containing <i>I-SceI</i> , used as template for <i>xyIS</i> and <i>P<sub>Pm</sub></i>                                                                                                   |                                     | See table S1      | 1                 |
| pWUR_Cas9sp1_hr            | pNW33n with spCas9-module containing spacer targeting the <i>pyrF</i> gene. This plasmid was used as a template for constructing the ThermoCas9 based constructs                                                | -                                   | -                 | 2                 |
| pThermo_Cas9               | <i>thermocas9</i> with N-term. His-tag and TEV cleavage site in pML-1B. Expression vector for ThermoCas9                                                                                                        | SspI and Ligase Independent Cloning | BG7886 and BG7887 | This study        |
| pThermo_dCas9              | <i>cas9dthermocas9</i> with N-term. His-tag and TEV cleavage site in pML-1B. Expression vector for catalytically inactive (dead) dThermoCas9                                                                    | SspI and Ligase Independent Cloning | BG7886 and BG7888 | This study        |

| Plasmid              | Description                                                                                                                                                                              | Restriction sites used | Primers      | Source     |
|----------------------|------------------------------------------------------------------------------------------------------------------------------------------------------------------------------------------|------------------------|--------------|------------|
| pNW-PAM7nt           | Target sequence in pNW33n vector containing a 7-nt degenerate PAM for <i>in vitro</i> PAM determination assay                                                                            | BamHI and BspHI        | See table S1 | This study |
| pNW63-pNW78          | Target sequence in pNW33n vector containing distinct nucleotides at the 6th and 7th positions of the PAM (CCCCC <u>N</u> NA)                                                             | BamHI and BspHI        | See table S1 | This study |
| pThermoCas9_ctrl     | pNW33n with ThermoCas9-module <sup>1</sup> containing a non-targeting spacer. Used as a negative control                                                                                 | -                      | See table S1 | This study |
| pThermoCas9_bsΔpyrF1 | pNW33n with ThermoCas9-module <sup>1</sup> containing spacer 1 targeting the <i>pyrF</i> gene and the fused us+ds <i>pyrF</i> -flanks                                                    | -                      | See table S1 | This study |
| pThermoCas9_bsΔpyrF2 | pNW33n with ThermoCas9-module <sup>1</sup> containing spacer 2 targeting the <i>pyrF</i> gene and the fused us+ds <i>pyrF</i> -flanks                                                    | -                      | See table S1 | This study |
| pThermoCas9i_ctrl    | pNW33n with Thermo-dCas9-module <sup>2</sup> containing a non-targeting spacer. Used as a wild-type control                                                                              | -                      | See table S1 | This study |
| pThermoCas9i_ldhL    | pNW33n with Thermo-dCas9-module <sup>2</sup> containing spacer 2 targeting the <i>ldhL</i> gene                                                                                          | -                      | See table S1 | This study |
| pThermoCas9_ppΔpyrF  | pEMG with ThermoCas9-module <sup>3</sup> for <i>Pseudomonas putida</i> containing a spacer targeting the a spacer targeting the <i>pyrF</i> gene and the fused us+ds <i>pyrF</i> -flanks | -                      | See table S1 | This study |

<sup>1</sup> The ThermoCas9 module contains *thermocas9* under the native P<sub>xyiL</sub> promoter followed by the sgRNA under the *B. coagulans* P<sub>pta</sub> promoter (Figure 4).

<sup>2</sup> Like the ThermoCas9 module, but with the *thermo-dCas9* instead of *thermocas9* (Figure 4).

<sup>3</sup> The ThermoCas9 module for *Pseudomonas putida* contains *thermocas9* under the transcriptional control of the inducible Pm-XylS system followed by the sgRNA under the constitutive P3 promoter.

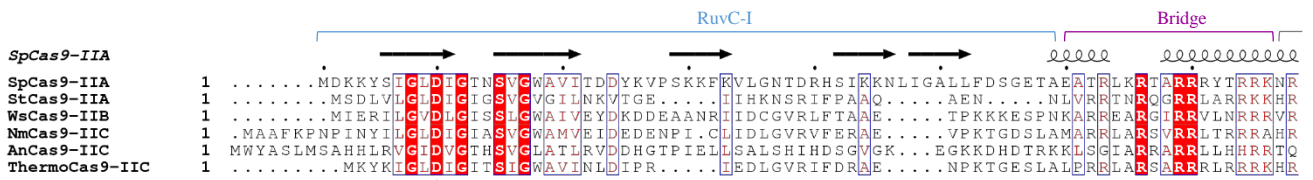

α-helical / recognition lobe

*SpCas9-IIA* 79 ICYQEQE IFSNEMAKVDDSFHRLLEESFIVVEEDKKHERHPIFGNIVDEVAYHEKYPTIYHDKKKLVDSSTDKADLRLLIYLALAHM  
 StCas9-IIA 63 RVRLLNRLFE...ESGLITDFTKIS...INLNPYQDLRVKGLTDELSNEE...LFIALKNM  
 WsCas9-IIIB 73 MNMILKLLFL...RAGLITQDVLDDGE...GGMFYSKANRADVWEDRHDGLYRLLKGD...LARVLIHI  
 NmCas9-IIIC 79 LLRACRLLK...REGVITQAAADFDE...NGLIKSLPNTFWRVRAAALDRKLLTPE...WSAVLLHI  
 AnCas9-IIIC 83 LQQDDEVLR...DLGFIPTPGEFL...DLNEQTDYRWRVRAARLVEEKLPEELRGPATSMVRRHI  
 ThermoCas9-IIIC 67 LERLRRLLFV...REGVITKEELN...KLFEEKHEIDVWQLRVEALDRKLNND...LARLILHI

α-helical / recognition lobe

*SpCas9-IIA* 162 IKFRGHFLIEGLDNPDSVDVKLFQLVQTYNQLFEENPINASGVDAKAILSARLSKSRLENLIAQLFGEKXNSLFGNLIALS  
 StCas9-IIA 113 VKHRCISYLLDDAS...DDGNSSVGDYAVIVKENSQQL...ETKTPGQIQLERYQTYGQLRGDFVVEKDG...  
 WsCas9-IIIB 132 AKHRCYKFGDDE...ADEESGKVKKAVVLRQNFEEA...GCRVTGWEWLNRER...GASGKRN...  
 NmCas9-IIIC 135 IKHRCYLSQRKNEGETADKELGALLKGVADNAHALQTG...DFRTPAELANKFE...KESGHIRN...  
 AnCas9-IIIC 144 ARKRCWRNYPYSVESLSPAEESSPFMKALERNRLATTG...EVLDDGITPQGAMAQVALTHNISMRRG...  
 ThermoCas9-IIIC 122 AKRRCFRSMNRKSE...RTNKENSTMLKHVEENRSILSS...YRTVAEMVVRDPT...KFSLHKRN...

α-helical / recognition lobe

*SpCas9-IIA* 247 GLTPNFKSNFDLAEDAKLQLSKDIYDDDLNLLAQIGDQYADLFLAAKNLSDAILLSDILRVNTEITKAPLSASMIKRYDEHHQD  
 StCas9-IIA 176 .....DYGRYRTSGETLDNIFGILLGKCTF  
 WsCas9-IIIB 188 .....IEKMVGHCTY  
 NmCas9-IIIC 195 .....DAVQKMLGHCTF  
 AnCas9-IIIC 208 .....LPGQGSF  
 ThermoCas9-IIIC 177 .....DDIEKRVGFCIF

α-helical / recognition lobe

*SpCas9-IIA* 332 LTLKALVLRQQLPEKYKEIFFDQSKNGYAGYIDGGASQEEFYKFIKPILEKMDGTEELLVVKLNREDLRLKQRFTFDNGSLPHQIHL  
 StCas9-IIA 178 HRLINVFPTSAYRSEALRILQTOEFN.PQITDE...FINRYLEILTGRKRYYHGPNEKSR  
 WsCas9-IIIB 190 GDYEISIHRLDVEVEAIFVAQOEMRSTIATDA...LKAAYREIAFFVRPMQR...  
 NmCas9-IIIC 197 GDYSHTFSRKDLQAEILILFEKQKFGNPHVSGG...LKEGIEITLLMTQRPALSG...  
 AnCas9-IIIC 209 EGILGKLHGDNANEIRKICARQGVSPDVCKQLLR...AVFKADSPRGSVAVS RVAFDP...  
 ThermoCas9-IIIC 179 DNYNTIVARDDLEREIKLIFAKQREYGNIVCIEA...FEHEYISLWASQRFPAASK...

α-helical / recognition lobe

*SpCas9-IIA* 417 GELHAILRRQEDFYFPLKDNREKIEKILTFRIPYVYVGPLARGNSRFAMWTRKSEETITPWNFEEVVDKGAQAQSFIERMTNFDHN  
 StCas9-IIA 237 .....DYGRYRTSGETLDNIFGILLGKCTF  
 WsCas9-IIIB 241 .....IEKMVGHCTY  
 NmCas9-IIIC 249 .....DAVQKMLGHCTF  
 AnCas9-IIIC 264 .....LPGQGSF  
 ThermoCas9-IIIC 231 .....DDIEKRVGFCIF

α-helical / recognition lobe

*SpCas9-IIA* 502 LPNEKVLPRKHSLLYEFITVYNEITKVKVYVTEGMRKRPALFSGEQKKAIVDLF...KTRNKVIVKQLKEDYFKKIECFDSVVISGVE  
 StCas9-IIA 262 YPDEFRAAKASYTAQENLNDLNNLTVPTET...KRLSKEQKNOIINYVK...NEKAMGPAKLFKYIAKLLSCDVADIKGYRID  
 WsCas9-IIIB 251 FPEERRAPKSAPTAEKFIATISKFPSTVINDNEGWEQKIIERTKLEELLDFAV...SREKVEFRHLRKLFLDLSDNIEFKGLHYKGGP  
 NmCas9-IIIC 261 EPADFPKAKNTYTAERFIWLTKNLNLRILEQG...SERPLTDTERTATLMDEPY...RKSCLTYAQARKLLGLEDTAFFKGLRYGK...  
 AnCas9-IIIC 271 R...RAPKCDPEFQRFRITISIVANLRISETKG.ENRPLTADERRRVVTFITEDSSQADLTWVDVAEKLGVHRRDLRGTAVHTDDG  
 ThermoCas9-IIIC 243 EPKERRAPKATYTFQSFTVWEHINKLRLVSPG...GIRALTDDERRIYKQAF...HKNKLTFFHDVRTLNLNLPDDTRFKGLYLDNRT

α-helical / recognition lobe

*SpCas9-IIA* 585 DRFNASLGTYHDDL...KIKKDKDFLONEENEDILEDIVLTLTFEDREMIETERTKYAHLFDDKVMKQLKRRY  
 StCas9-IIA 341 KSGKAEIHTFEAYR...KMKLTLELDIEQMDRETLDKLAIVLTLNTEREGIQEALHEH...EFADGFSQKQVDEL  
 WsCas9-IIIB 334 KTAKKREATLFDPNPETELEFDKVEAEKAWISLRGAAKLREALGNEFYGRFVALGKHADAEATKILT...YKDEGQKRELTKL  
 NmCas9-IIIC 340 ...DNAAEASTLMEMK...AYHAISRALEKREGLDKKSPNLNSELQDEIGTAFSLRFTDDEDITGR...DR  
 AnCas9-IIIC 351 ERSAARPPIDATR...TMRQTKISSLKTWEEADESEQRGAMIRVLYDEPDTDSQAE...IIAELPE  
 ThermoCas9-IIIC 324 TLKENEKVRFLLELG...AYHKIRKAIDS...VYGKGAAKSFRPIDDFGYALTMRKDDTDITRSYLRN...EYEQNGKRMENLADK

α-helical / recognition lobe

*SpCas9-IIA* 657 TGWGRLSRKINGIRDKSGKTTLDLFLKSDGFANRNFQMLIHDDSLTFKEDIQKAQVSGGQDSLHEHIANLAGSPTAKRGLTQTV  
 StCas9-IIA 410 VQFRKANSSIFGKGWHNFVSKLMMEL...IPELYET...SEEQMTILTRLGKQKTTSSSNKTYIDEKLLTEEIYNBVVAKSVROAI  
 WsCas9-IIIB 416 PLEAEVVERLVKIGFSDFLKLSLKAIRIDLPAVES...GARYDEAVLMLG...VPHKEKSAIPLPNKTDIDILNPTVIRAFQAFR  
 NmCas9-IIIC 403 IQPELLEALLVKHSIFDFVQISLKAIRIPLVMEQ...GKRYDEACAEIYGDHYGKKNTEEKIYLPPEIPADEIRNPPVLRALSQAR  
 AnCas9-IIIC 412 EDQAKLDSLHPAGRAAYGRESLITLSDHMLATTD...DLHEARKRIFG...VDDSWAPPAEAINAPVGNPSVDRITLKIIVG  
 ThermoCas9-IIIC 401 VYDEELIEELNLNLSFSKFGHLSLKAIRNIPYMEQ...GEVYSTACBRAGYFTGPKKKQKTVLLPNIPP...IANBVMRALTQAR

RuvC-II



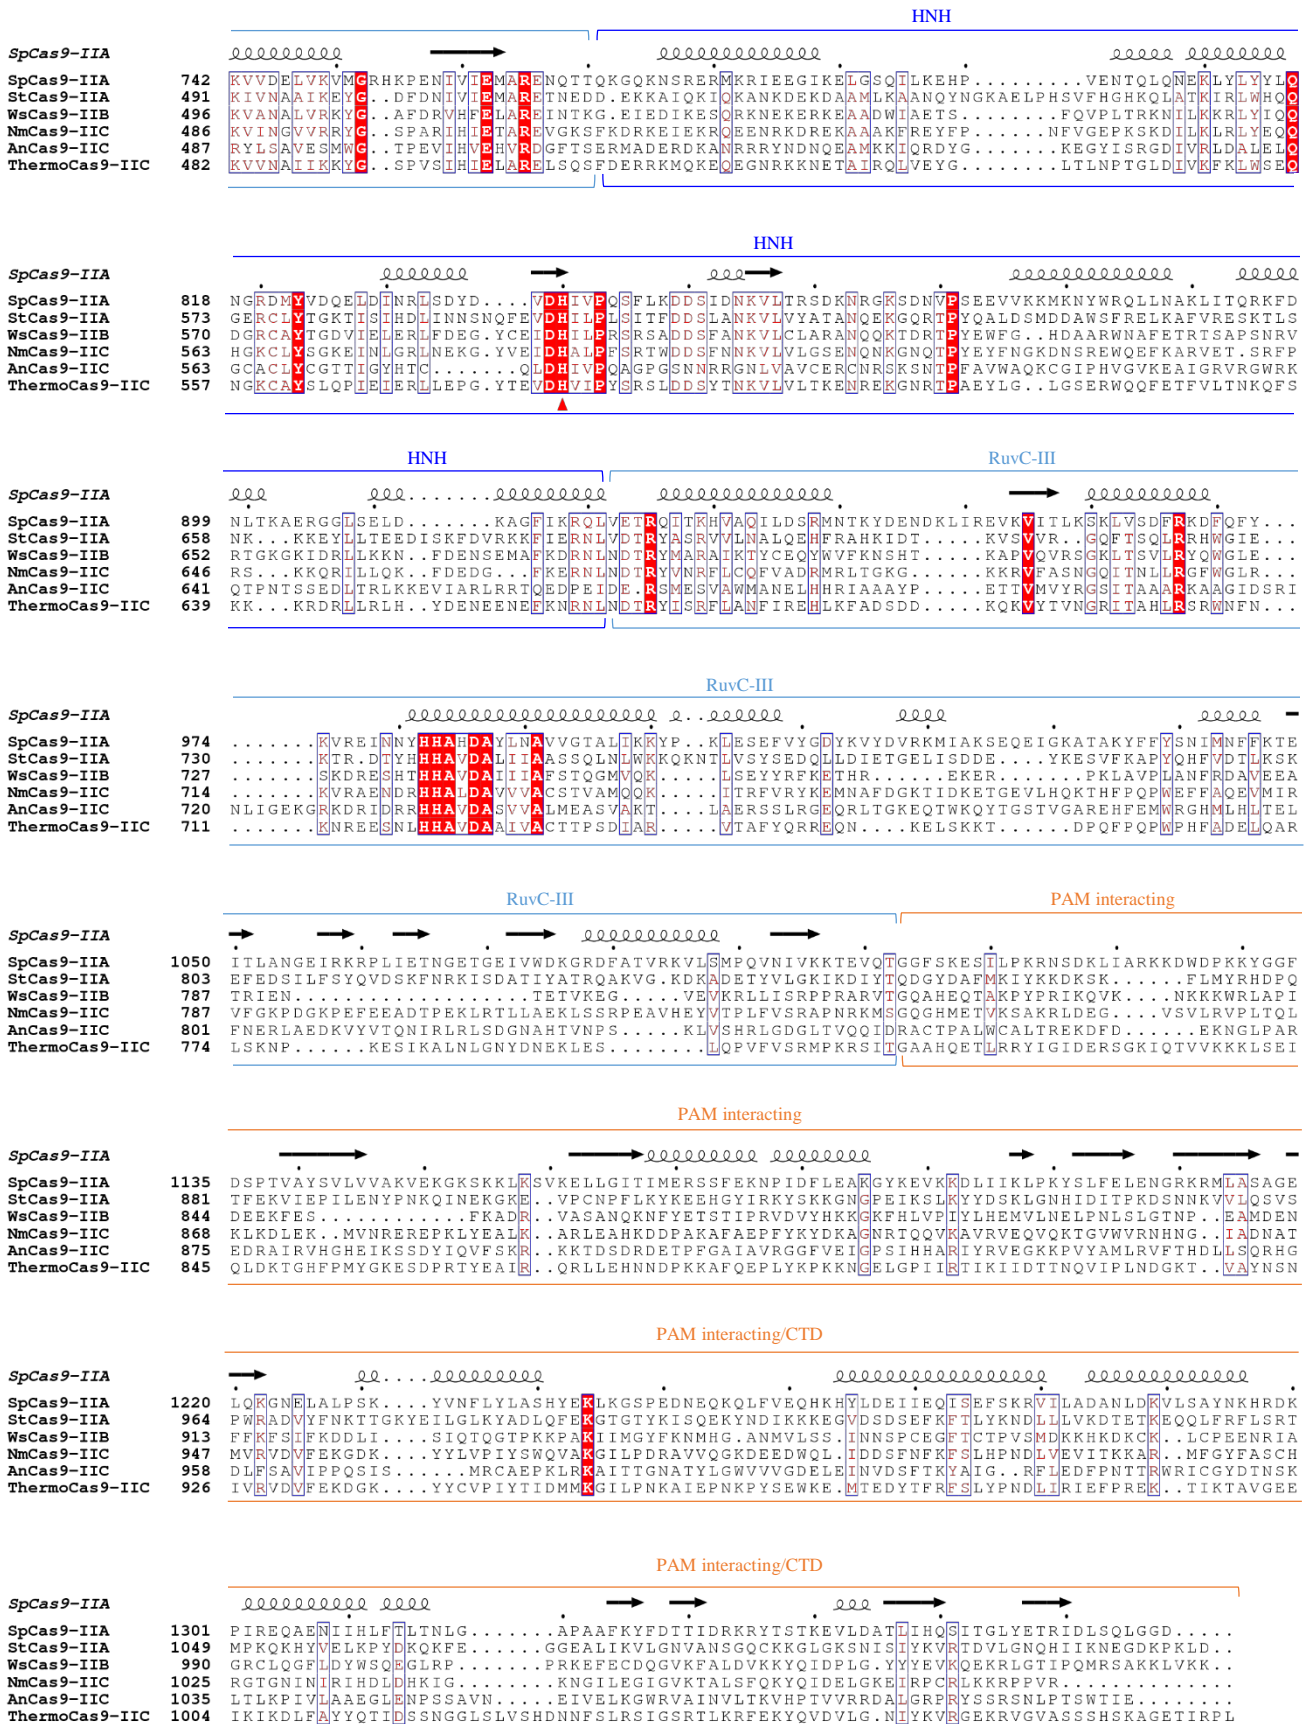

### Supplementary Fig. 1 | Multiple sequence alignment of Type II-A, B and C Cas9 orthologues.

Cas9 protein sequences of *Streptococcus pyogenes* (Sp), *Streptococcus thermophilus* (St), *Wolinella succinogenes* (Ws), *Neisseria meningitidis* (Nm), *Actinomyces naeslundii* (An), and *Geobacillus thermodentrificans* (Thermo) were aligned using ClustalW<sup>3</sup> in MEGA7<sup>4</sup> with default settings; ESPrpt<sup>5</sup> was used to generate the visualization. Strictly conserved residues are shown in white text on red background; similar residues are shown in red text on white background. Red pyramids indicate the two conserved nuclease domains in all sequences. Horizontal black arrow and curls indicate  $\beta$ -strands and  $\alpha$ -helices, respectively, in the SpCas9 secondary structure (protein database nr 4CMP<sup>6</sup>). Structural domains are indicated for SpCas9 and ThermoCas9 using the same colour scheme as in Figure 1A.



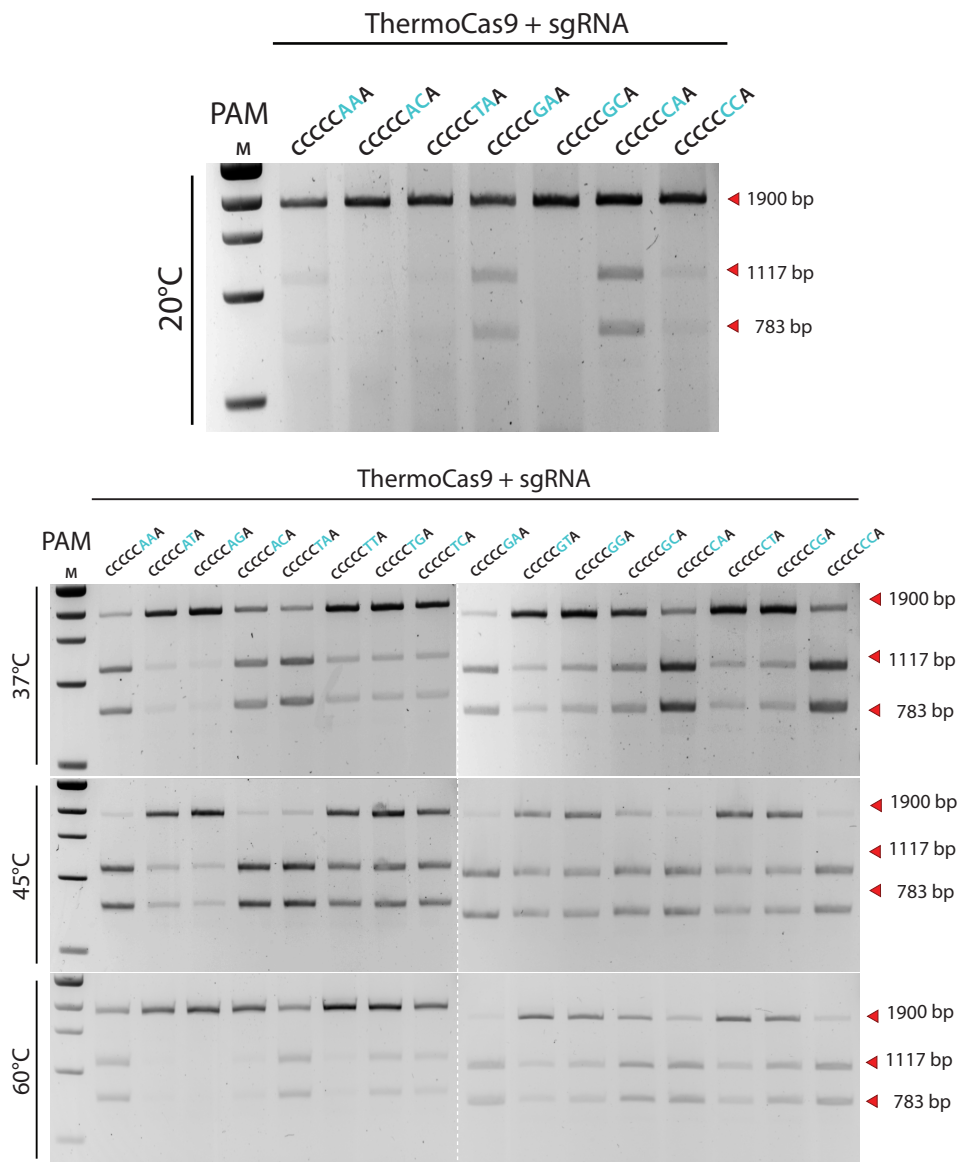

**Supplementary Fig. 3 | ThermoCas9 PAM discovery.**

*In vitro* cleavage assays for DNA targets with different PAMs at 20°C, 37°C, 45°C and 60°C. Seven (20°C) or sixteen (37°C, 45°C, 60°C) linearized plasmid targets, each containing a distinct 5'-CCCCNNA-3' PAM, were incubated with ThermoCas9 and sgRNA, then analysed by agarose gel electrophoresis.

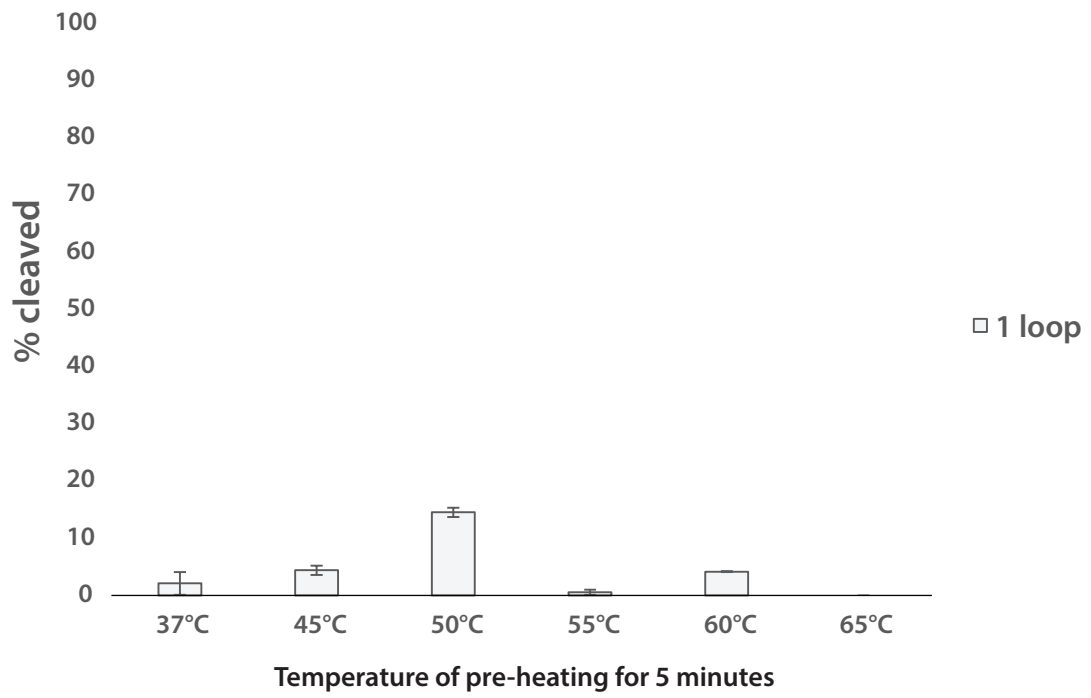

**Supplementary Fig. 4 | Activity of ThermoCas9 at a wide temperature range using sgRNA containing one stem-loop.**

The importance of the predicted three stem loops of the tracrRNA scaffold was tested by transcribing truncated variations of the sgRNA and evaluating their ability to guide ThermoCas9 to cleave target DNA at various temperatures. Shown above is the effect of one stem-loop on the activity of ThermoCas9 at various temperatures. Average values from at least two biological replicates are shown, with error bars representing S.D.

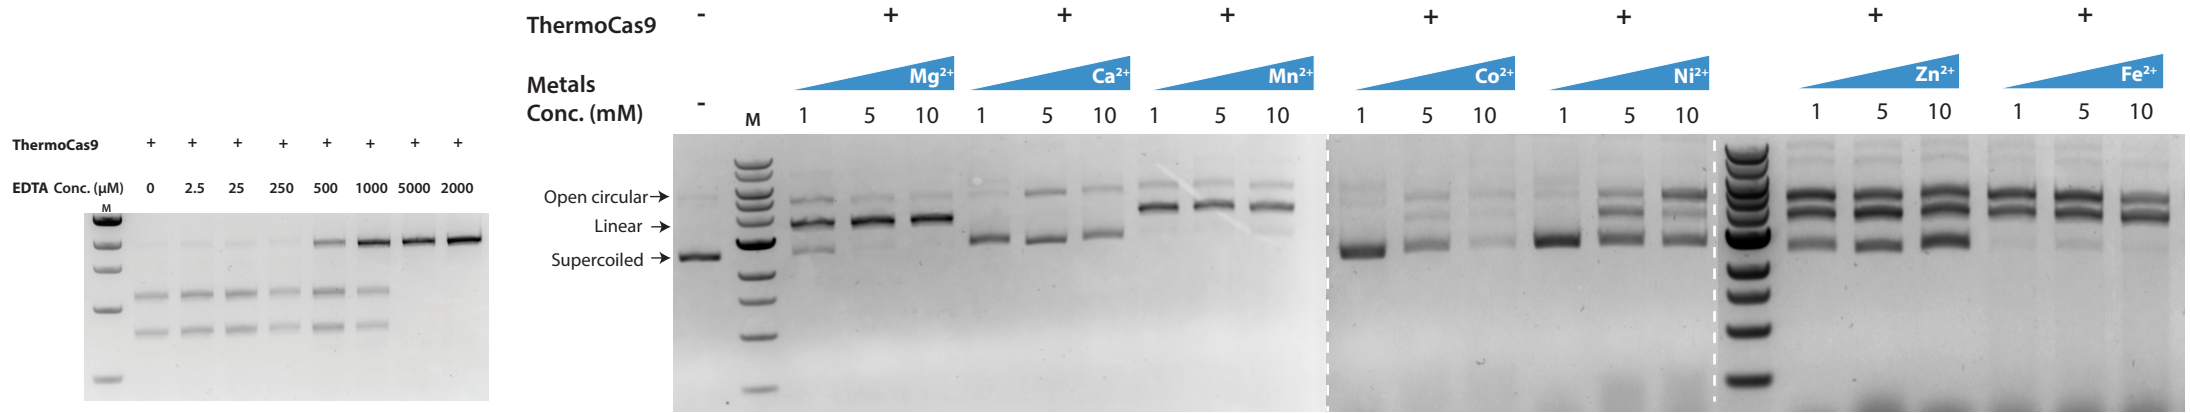

**B.**

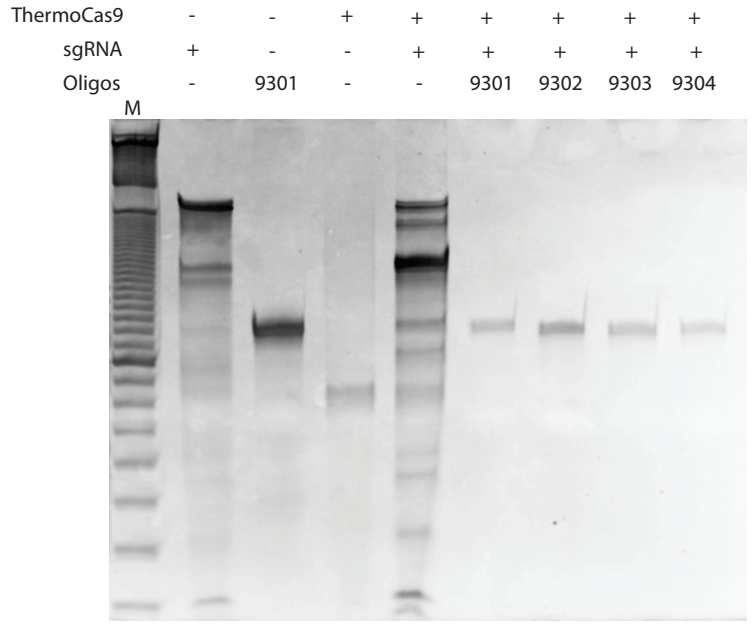

**Supplementary Fig. 5 | ThermoCas9 mediates dsDNA targeting using divalent cations as catalysts and does not cleave ssDNA.**

(A) *In vitro* DNA cleavage by ThermoCas9 with EDTA and various metal ions. M = 1 kb DNA ladder.

(B) Activity of ThermoCas9 on ssDNA substrates. M= 10 bp DNA ladder.

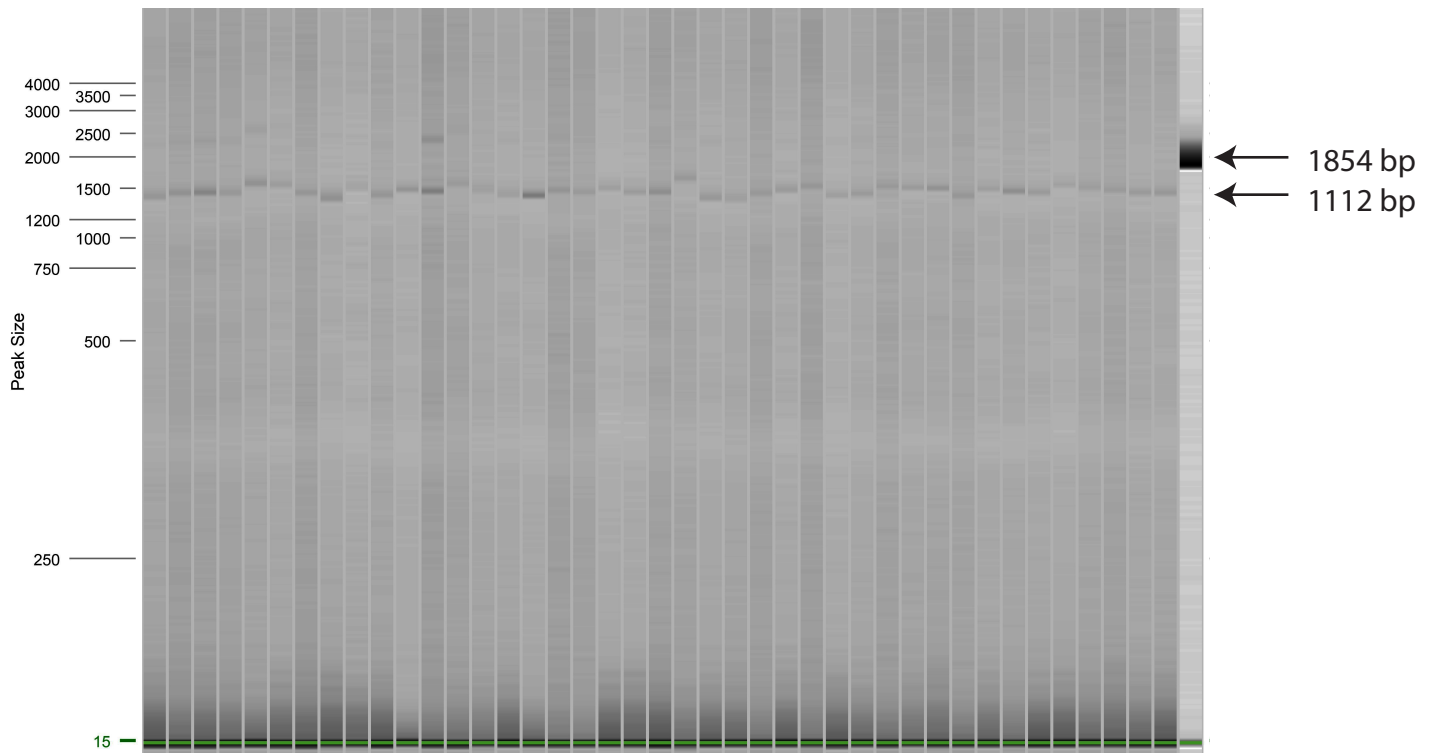

**Supplementary Fig. 6 | Colony PCR of *P. putida* ThermoCas9-based *pyrF* deletion.**

Capillary gel electrophoresis showing the resulting products from genome-specific PCR on the obtained colonies from the ThermoCas9-based *pyrF* deletion process from the genome of *Pseudomonas putida*. The 1854 bp band and the 1112 bp band corresponds to the *pyrF* and  $\Delta pyrF$  genotype, respectively.

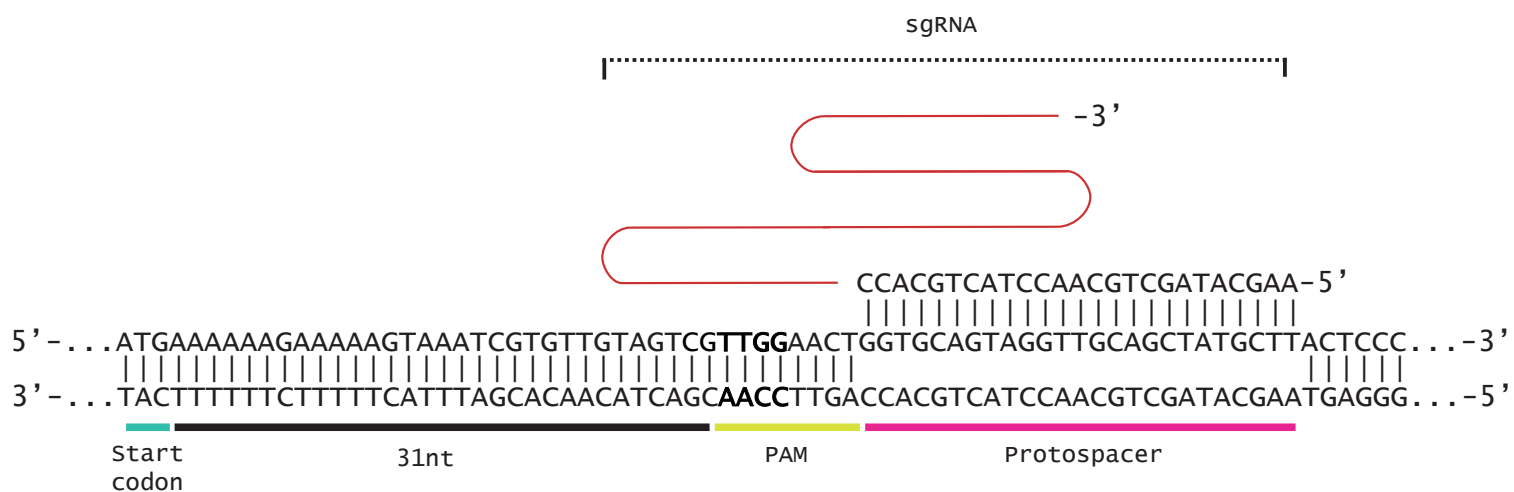

**Supplementary Fig. 7 | Spacer selection for the *ldhL* silencing experiment.**

Schematic representation of the spacer (sgRNA)-protospacer annealing during the *ldhL* silencing process; the selected protospacer resides on the non-template strand and 39nt downstream the start codon of the *ldhL* gene. The PAM sequence is shown in bold.

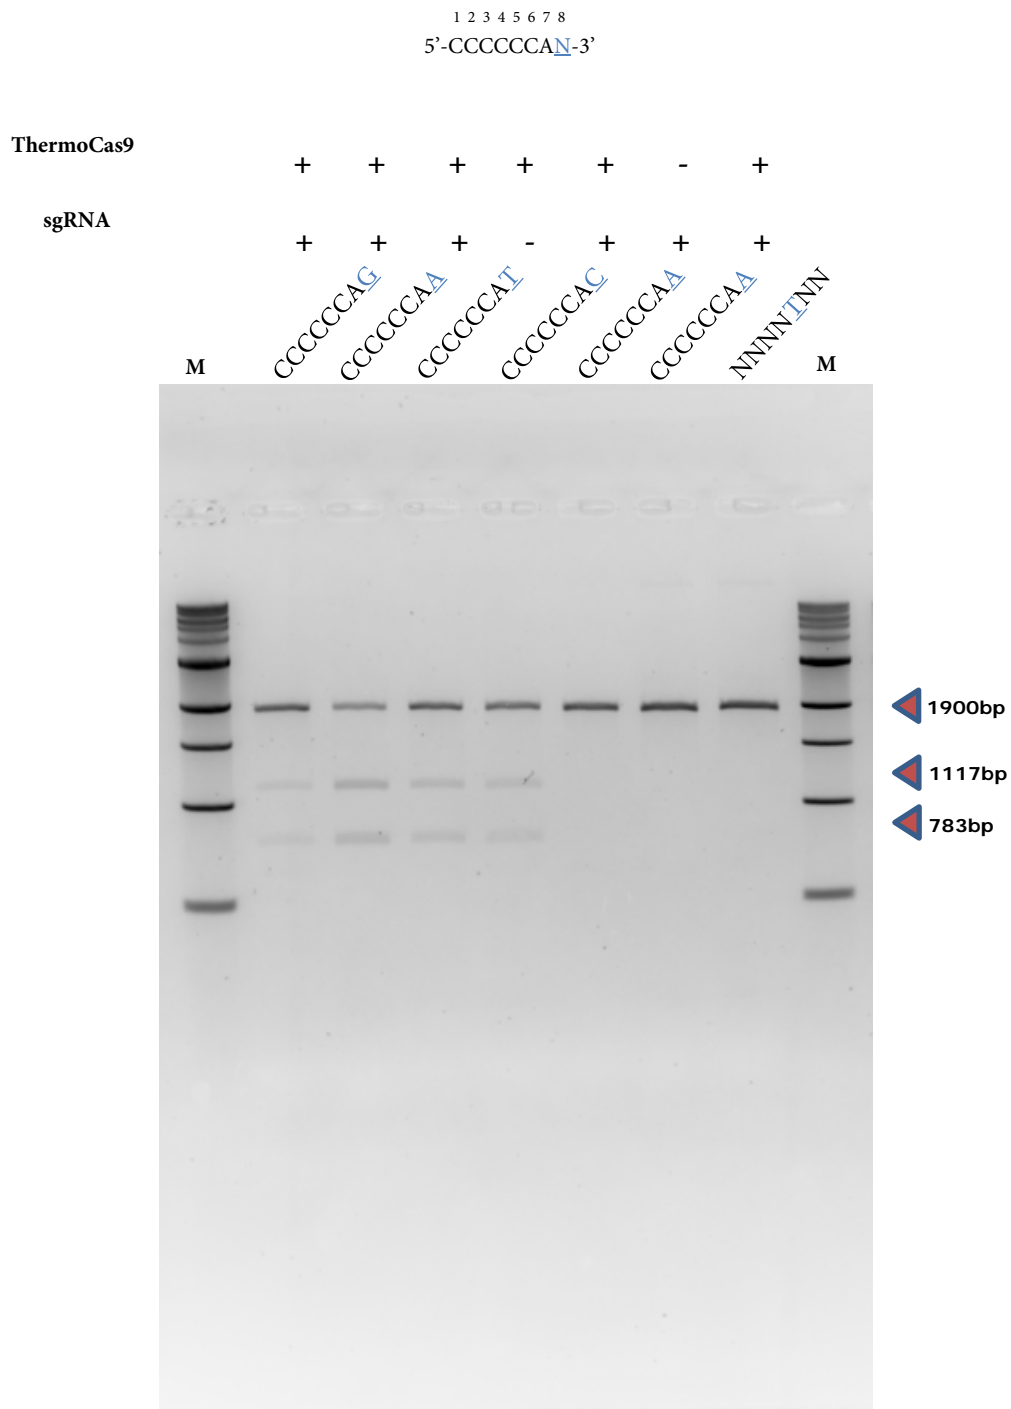

Supplementary Fig. 8 | Uncropped blots of figure 2c.



1 2 3 4 5 6 7 8  
5'-CCGCCNNA-3'  
most preferred NA  
MC  
ThermoCas9 + sgRNA

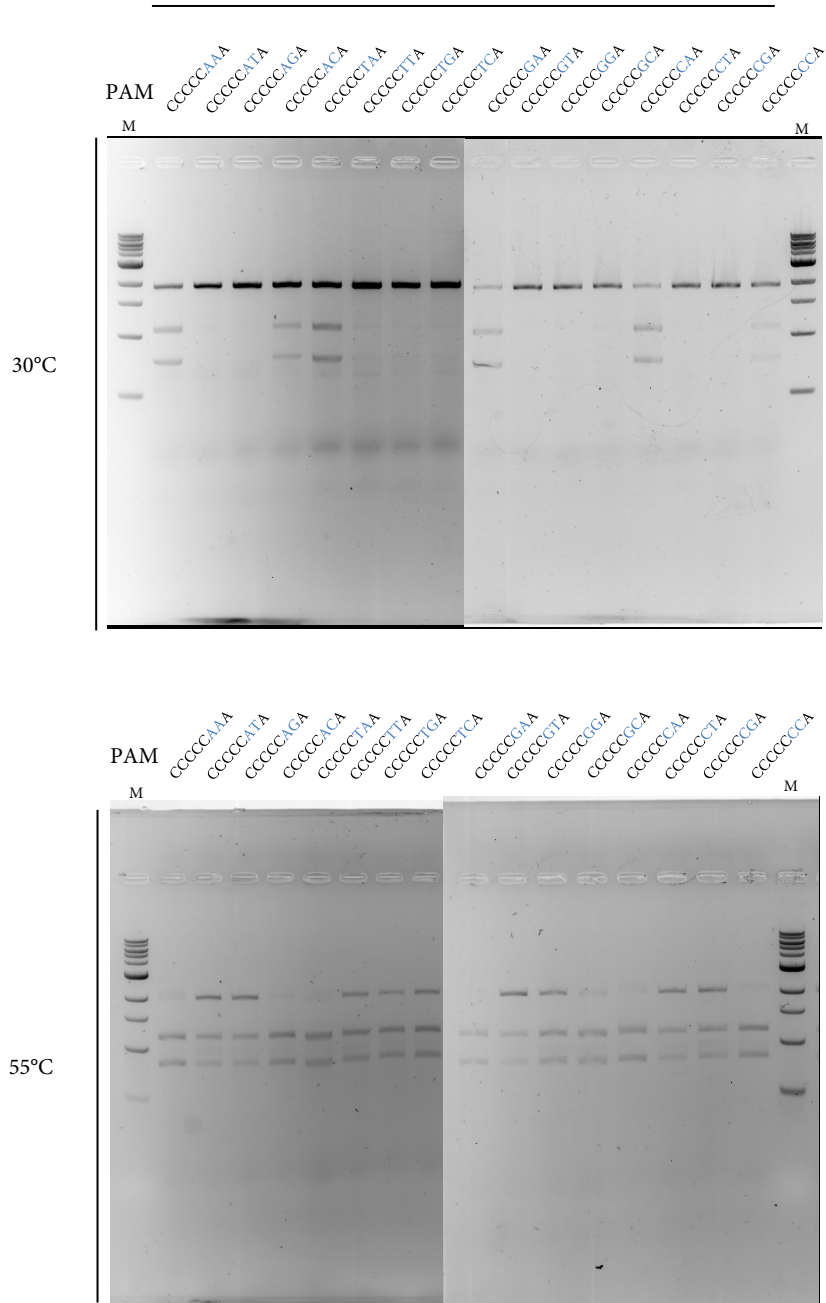

Supplementary Fig. 9 | Uncropped blots of figure 2d.

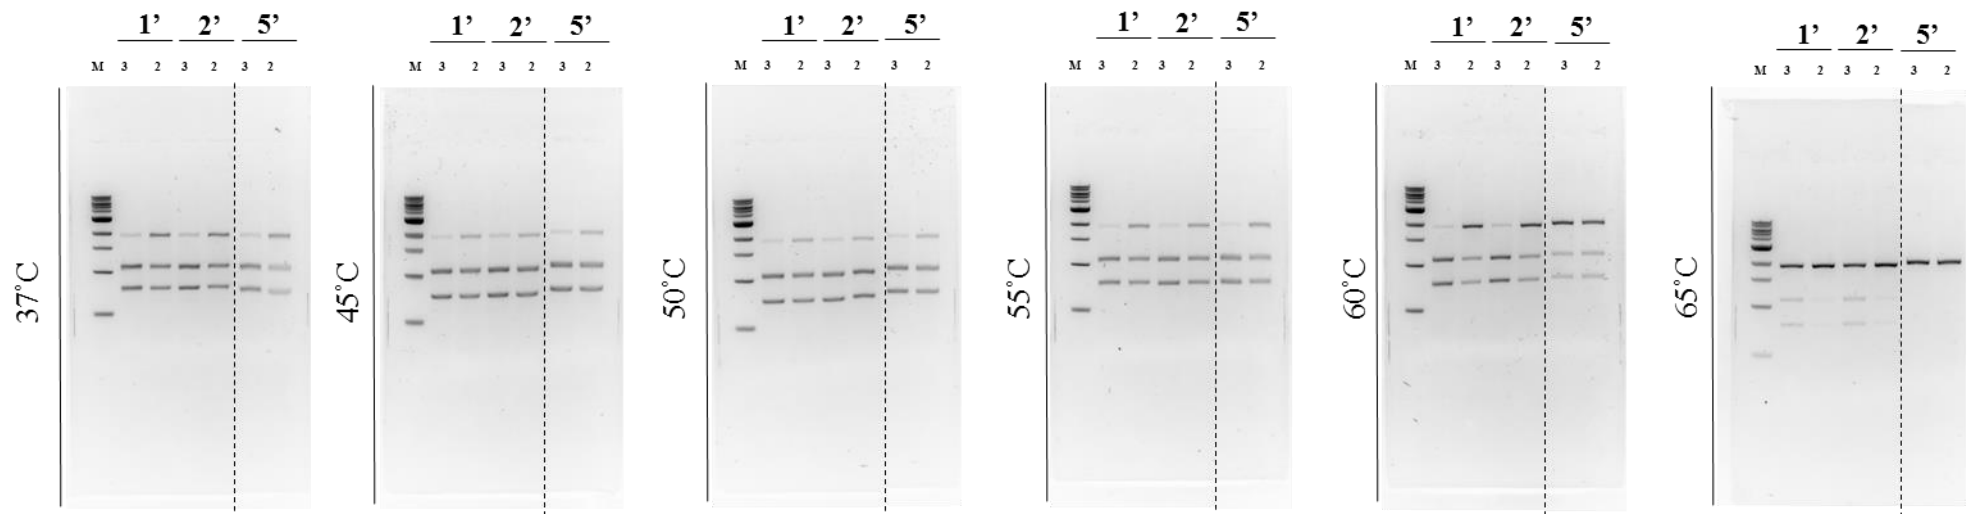

Supplementary Fig. 10 | Agarose gels used for quantification of cleavage using 3- and 2- hairpins in the sgRNA as shown in figure 3b.

Spacer length (nt) 25 24 23 22 21 20 19 18  
M

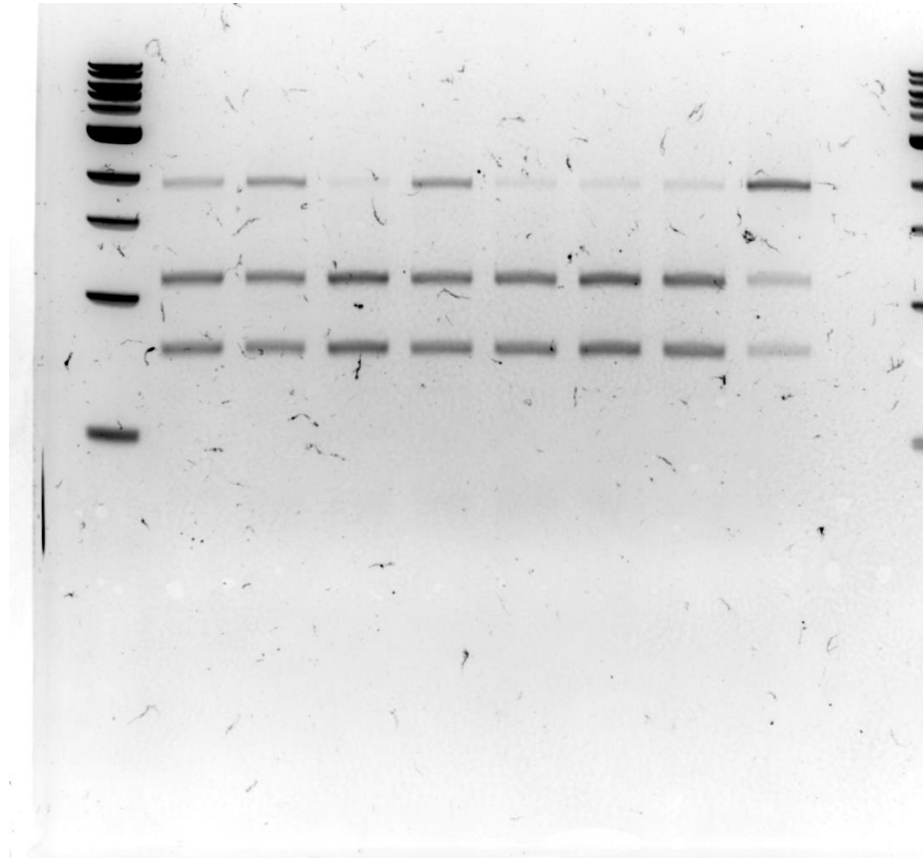

Supplementary Fig. 11 | Uncropped blots used for the quantification of spacer length truncations assays in figure 3c.

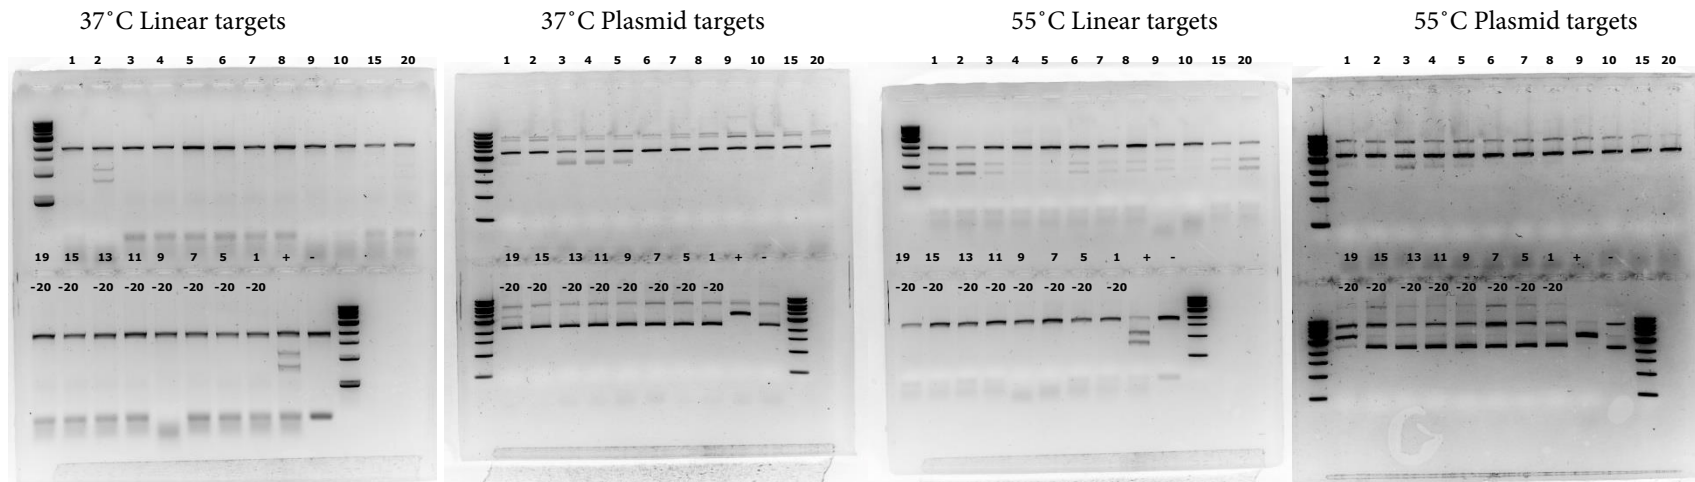

Supplementary Fig. 12 | Agarose gels used for the quantification of mismatch tolerance assay in figure 4b, c.

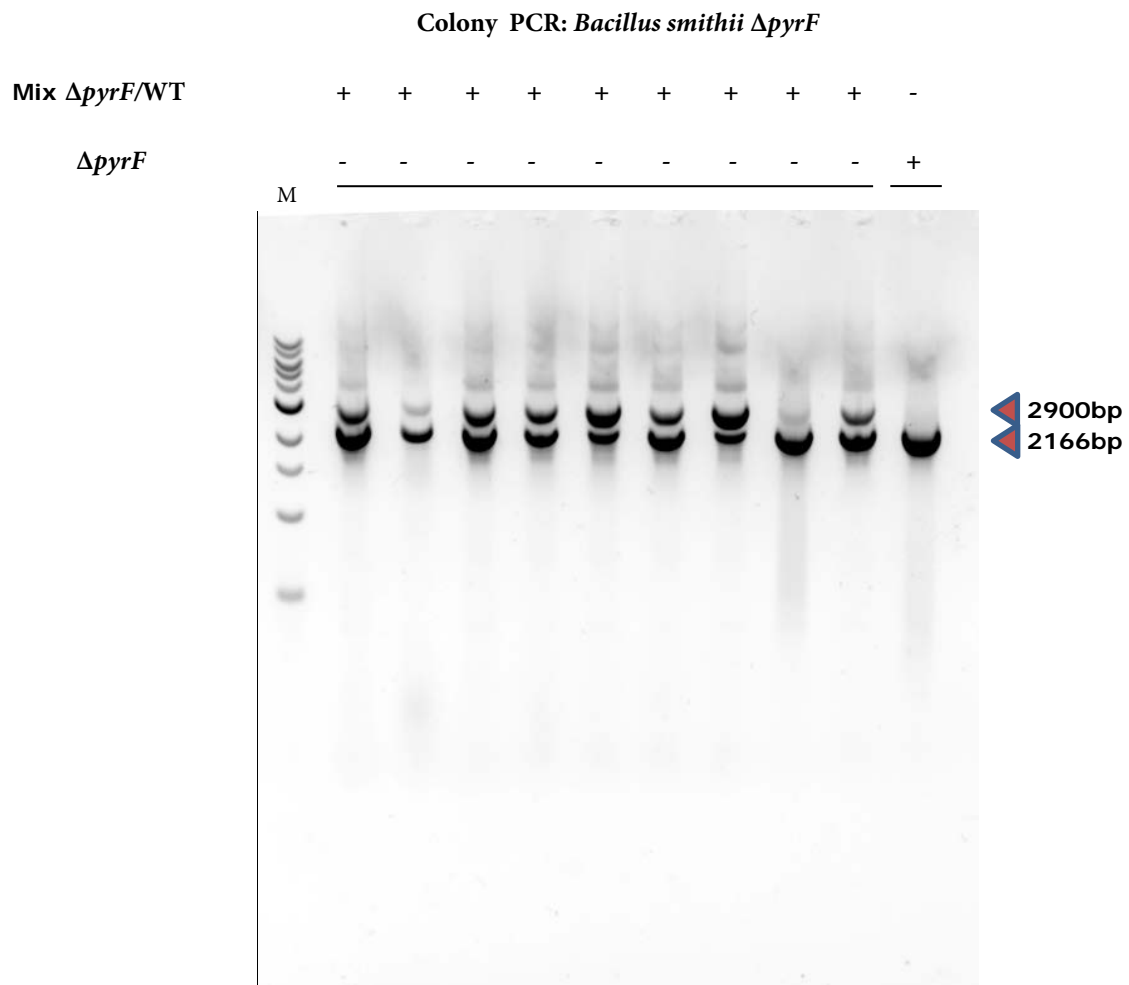

Supplementary Fig. 13 | Uncropped blot of figure 5b.

## Supplementary references

1. Martinez-Garcia, E. & de Lorenzo, V. Engineering multiple genomic deletions in Gram-negative bacteria: analysis of the multi-resistant antibiotic profile of *Pseudomonas putida* KT2440. *Environ. Microbiol.* **13**, 2702–2716 (2011).
2. Mougiakos, I. *et al.* Efficient genome editing of a facultative thermophile using mesophilic spCas9. *ACS Synth. Biol.* **6**, 849–861 (2017).
3. Larkin, M. A. *et al.* Clustal W and Clustal X version 2.0. *Bioinformatics* **23**, 2947–2948 (2007).
4. Kumar, S., Stecher, G. & Tamura, K. MEGA7: Molecular evolutionary genetics analysis version 7.0 for bigger datasets. *Mol. Biol. Evol.* **33**, 1870–1874 (2016).
5. Gouet, P., Courcelle, E., Stuart, D. I. & Métoz, F. ESPript: analysis of multiple sequence alignments in PostScript. *Bioinformatics* **15**, 305–8 (1999).
6. Jinek, M. *et al.* Structures of Cas9 endonucleases reveal RNA-mediated conformational activation. *Science (80-. )*. **343**, 1247997–1247997 (2014).
7. Biswas, A., Gagnon, J. N., Brouns, S. J. J., Fineran, P. C. & Brown, C. M. CRISPRTarget: bioinformatic prediction and analysis of crRNA targets. *RNA Biol.* **10**, 817–827 (2013).
8. Crooks, G. E., Hon, G., Chandonia, J.-M. & Brenner, S. E. WebLogo: A sequence logo generator. *Genome Res.* **14**, 1188–1190 (2004).
